# Supplementary material for: Associations between socioeconomic position and young people’s physical activity and sedentary behaviour in the UK: a scoping review
Source: HighWire-hosted journal article supplement (doi:10.1136/bmjopen-2021-051736), 2022-05-01
Supplement: bmjopen-2021-051736supp001_data_supplement.pdf [file bmjopen-2021-051736supp001_data_supplement.pdf]

## Supplementary File 1: Pubmed Search

| Search number | Query                    | Sort By          | Filters | Search Details                                                                                                                                                                                                                                                                                                                                                                                                                                                                                                                                                                                                                                                                                                                                                                                                                                                                               | Results | Time     |
|---------------|--------------------------|------------------|---------|----------------------------------------------------------------------------------------------------------------------------------------------------------------------------------------------------------------------------------------------------------------------------------------------------------------------------------------------------------------------------------------------------------------------------------------------------------------------------------------------------------------------------------------------------------------------------------------------------------------------------------------------------------------------------------------------------------------------------------------------------------------------------------------------------------------------------------------------------------------------------------------------|---------|----------|
| 13            | #4 AND #5 AND #7 AND #10 | Publication Date |         | ("Demographic"[Title/Abstract] OR "family"[Title/Abstract] OR "education level"[Title/Abstract] OR "SES"[Title/Abstract] OR "socioeconomic status"[Title/Abstract] OR "social position"[Title/Abstract] OR "socioeconomic position"[Title/Abstract] OR "SEP"[Title/Abstract] OR "employment"[Title/Abstract] OR "income"[Title/Abstract] OR "occupational status"[Title/Abstract] OR "occupational class"[Title/Abstract] OR "depriv*"[Title/Abstract] OR "affluence"[Title/Abstract] OR "maternal education"[Title/Abstract] OR "parent education"[Title/Abstract] OR "car ownership"[Title/Abstract]) AND ("adolescent"[MeSH Terms] OR "child"[MeSH Terms:noexp]) AND ("child"[MeSH Terms:noexp] OR "adolescent"[MeSH Terms]) AND (("physical*"[Title/Abstract] OR "activ*"[Title/Abstract] OR "physical activity"[Title/Abstract] OR "sport"[Title/Abstract] OR "cycling"[Title/Abstract] | 2,481   | 10:45:04 |

|  |  |  |  |                                                                                                                                                                                                                                                                                                                                                                                                                                                                                                                                                                                                                                                                                                                                                                                                                                                                                                                                                                                                                                                                                                          |  |
|--|--|--|--|----------------------------------------------------------------------------------------------------------------------------------------------------------------------------------------------------------------------------------------------------------------------------------------------------------------------------------------------------------------------------------------------------------------------------------------------------------------------------------------------------------------------------------------------------------------------------------------------------------------------------------------------------------------------------------------------------------------------------------------------------------------------------------------------------------------------------------------------------------------------------------------------------------------------------------------------------------------------------------------------------------------------------------------------------------------------------------------------------------|--|
|  |  |  |  | OR<br>"bicycling"[Title/Abstract]<br>OR<br>"walking"[Title/Abstract]<br>OR "physical<br>education"[Title/Abstract]<br>OR<br>"exercise"[Title/Abstract]<br>OR "energy<br>expenditure"[Title/Abstract] OR "physical<br>inactivity"[Title/Abstract]<br>OR "physical<br>fitness"[Title/Abstract]<br>OR "active<br>travel"[Title/Abstract] OR<br>"commuting"[Title/Abstract] OR "motor<br>activity"[Title/Abstract]<br>OR "play"[Title/Abstract])<br>AND ("child"[MeSH<br>Terms:noexp] OR<br>"adolescent"[MeSH<br>Terms])) AND<br>(("sedentar*" [Title/Abstract] OR "sedentary<br>behavio*" [Title/Abstract]<br>OR<br>"Computer"[Title/Abstract] OR "tv<br>viewing"[Title/Abstract]<br>OR<br>"sitting"[Title/Abstract]<br>OR<br>"Television"[Title/Abstract] OR "Screen-<br>Time"[Title/Abstract] OR<br>"Screen-<br>Based"[Title/Abstract] OR<br>"Screen-<br>Based"[Title/Abstract] OR<br>"inactiv*" [Title/Abstract]<br>OR "sedentary<br>time"[Title/Abstract] OR<br>"sitting<br>time"[Title/Abstract] OR<br>"Screen-<br>Time"[Title/Abstract])<br>AND ("child"[MeSH<br>Terms:noexp] OR<br>"adolescent"[MeSH |  |
|--|--|--|--|----------------------------------------------------------------------------------------------------------------------------------------------------------------------------------------------------------------------------------------------------------------------------------------------------------------------------------------------------------------------------------------------------------------------------------------------------------------------------------------------------------------------------------------------------------------------------------------------------------------------------------------------------------------------------------------------------------------------------------------------------------------------------------------------------------------------------------------------------------------------------------------------------------------------------------------------------------------------------------------------------------------------------------------------------------------------------------------------------------|--|

|  |  |  |  |                                                                                                                                                                                                                                                                                                                                                                                                                                                                                                                                    |  |  |
|--|--|--|--|------------------------------------------------------------------------------------------------------------------------------------------------------------------------------------------------------------------------------------------------------------------------------------------------------------------------------------------------------------------------------------------------------------------------------------------------------------------------------------------------------------------------------------|--|--|
|  |  |  |  | Terms]) AND ("child"[MeSH Terms:noexp] OR "adolescent"[MeSH Terms])) AND (("child"[Title/Abstract] OR "children"[Title/Abstract] OR "childhood"[Title/Abstract] OR "kids"[Title/Abstract] OR "adolescen*"[Title/Abstract] OR "young person"[Title/Abstract] OR "young people"[Title/Abstract] OR "teen*"[Title/Abstract] OR "youth*"[Title/Abstract] OR "boy"[Title/Abstract] OR "girl*"[Title/Abstract]) AND ("child"[MeSH Terms:noexp] OR "adolescent"[MeSH Terms]) AND ("child"[MeSH Terms:noexp] OR "adolescent"[MeSH Terms])) |  |  |
|--|--|--|--|------------------------------------------------------------------------------------------------------------------------------------------------------------------------------------------------------------------------------------------------------------------------------------------------------------------------------------------------------------------------------------------------------------------------------------------------------------------------------------------------------------------------------------|--|--|

|    |                          |                  |                   |                                                                                                                                                                                                                                                                                                                                                                                                                                                                                                                                                                                                                                                                                                                                                                                                                                                                                                                                                                                                                                                     |       |          |
|----|--------------------------|------------------|-------------------|-----------------------------------------------------------------------------------------------------------------------------------------------------------------------------------------------------------------------------------------------------------------------------------------------------------------------------------------------------------------------------------------------------------------------------------------------------------------------------------------------------------------------------------------------------------------------------------------------------------------------------------------------------------------------------------------------------------------------------------------------------------------------------------------------------------------------------------------------------------------------------------------------------------------------------------------------------------------------------------------------------------------------------------------------------|-------|----------|
| 12 | #4 AND #5 AND #7 AND #10 | Publication Date | Child: 6-12 years | ("Demographic"[Title/Abstract] OR<br>"family"[Title/Abstract] OR<br>"education level"[Title/Abstract] OR<br>"SES"[Title/Abstract] OR<br>"socioeconomic status"[Title/Abstract] OR<br>"social position"[Title/Abstract] OR<br>"socioeconomic position"[Title/Abstract] OR<br>"SEP"[Title/Abstract] OR<br>"employment"[Title/Abstract] OR<br>"income"[Title/Abstract] OR<br>"occupational status"[Title/Abstract] OR<br>"occupational class"[Title/Abstract] OR<br>"depriv*"[Title/Abstract] OR<br>"affluence"[Title/Abstract] OR<br>"maternal education"[Title/Abstract] OR<br>"parent education"[Title/Abstract] OR<br>"car ownership"[Title/Abstract]) AND<br>("adolescent"[MeSH Terms] OR "child"[MeSH Terms:noexp]) AND<br>("child"[MeSH Terms:noexp] OR "adolescent"[MeSH Terms]) AND<br>(("physical*"[Title/Abstract] OR<br>"activ*"[Title/Abstract] OR<br>"physical activity"[Title/Abstract] OR<br>"sport"[Title/Abstract] OR<br>"cycling"[Title/Abstract] OR<br>"bicycling"[Title/Abstract] OR<br>"walking"[Title/Abstract] OR<br>"physical | 1,869 | 10:44:59 |
|----|--------------------------|------------------|-------------------|-----------------------------------------------------------------------------------------------------------------------------------------------------------------------------------------------------------------------------------------------------------------------------------------------------------------------------------------------------------------------------------------------------------------------------------------------------------------------------------------------------------------------------------------------------------------------------------------------------------------------------------------------------------------------------------------------------------------------------------------------------------------------------------------------------------------------------------------------------------------------------------------------------------------------------------------------------------------------------------------------------------------------------------------------------|-------|----------|

|  |  |  |  |                                                                                                                                                                                                                                                                                                                                                                                                                                                                                                                                                                                                                                                                                                                                                                                                                                                                                                                                                                                                                                                                                                           |  |  |
|--|--|--|--|-----------------------------------------------------------------------------------------------------------------------------------------------------------------------------------------------------------------------------------------------------------------------------------------------------------------------------------------------------------------------------------------------------------------------------------------------------------------------------------------------------------------------------------------------------------------------------------------------------------------------------------------------------------------------------------------------------------------------------------------------------------------------------------------------------------------------------------------------------------------------------------------------------------------------------------------------------------------------------------------------------------------------------------------------------------------------------------------------------------|--|--|
|  |  |  |  | education"[Title/Abstract]<br>OR<br>"exercise"[Title/Abstract]<br>OR "energy<br>expenditure"[Title/Abstract] OR "physical<br>inactivity"[Title/Abstract]<br>OR "physical<br>fitness"[Title/Abstract]<br>OR "active<br>travel"[Title/Abstract] OR<br>"commuting"[Title/Abstract] OR "motor<br>activity"[Title/Abstract]<br>OR "play"[Title/Abstract])<br>AND ("child"[MeSH<br>Terms:noexp] OR<br>"adolescent"[MeSH<br>Terms])) AND<br>(("sedentar*" [Title/Abstract] OR "sedentary<br>behavio*" [Title/Abstract]<br>OR<br>"Computer"[Title/Abstract] OR "tv<br>viewing"[Title/Abstract]<br>OR<br>"sitting"[Title/Abstract]<br>OR<br>"Television"[Title/Abstract] OR "Screen-<br>Time"[Title/Abstract] OR<br>"Screen-<br>Based"[Title/Abstract] OR<br>"Screen-<br>Based"[Title/Abstract] OR<br>"inactiv*" [Title/Abstract]<br>OR "sedentary<br>time"[Title/Abstract] OR<br>"sitting<br>time"[Title/Abstract] OR<br>"Screen-<br>Time"[Title/Abstract])<br>AND ("child"[MeSH<br>Terms:noexp] OR<br>"adolescent"[MeSH<br>Terms])) AND<br>("child"[MeSH<br>Terms:noexp] OR<br>"adolescent"[MeSH<br>Terms])) AND |  |  |
|--|--|--|--|-----------------------------------------------------------------------------------------------------------------------------------------------------------------------------------------------------------------------------------------------------------------------------------------------------------------------------------------------------------------------------------------------------------------------------------------------------------------------------------------------------------------------------------------------------------------------------------------------------------------------------------------------------------------------------------------------------------------------------------------------------------------------------------------------------------------------------------------------------------------------------------------------------------------------------------------------------------------------------------------------------------------------------------------------------------------------------------------------------------|--|--|

|  |  |  |  |                                                                                                                                                                                                                                                                                                                                                                                                                                                                                                                                       |  |  |
|--|--|--|--|---------------------------------------------------------------------------------------------------------------------------------------------------------------------------------------------------------------------------------------------------------------------------------------------------------------------------------------------------------------------------------------------------------------------------------------------------------------------------------------------------------------------------------------|--|--|
|  |  |  |  | ((("child"[Title/Abstract]<br>OR<br>"children"[Title/Abstract]<br>OR<br>"childhood"[Title/Abstract]<br>OR<br>"kids"[Title/Abstract] OR<br>"adolescen*"[Title/Abstract]<br>OR "young<br>person"[Title/Abstract]<br>OR "young<br>people"[Title/Abstract]<br>OR<br>"teen*"[Title/Abstract]<br>OR<br>"youth*"[Title/Abstract]<br>OR "boy"[Title/Abstract]<br>OR "girl*"[Title/Abstract])<br>AND ("child"[MeSH<br>Terms:noexp] OR<br>"adolescent"[MeSH<br>Terms]) AND<br>("child"[MeSH<br>Terms:noexp] OR<br>"adolescent"[MeSH<br>Terms])) |  |  |
|--|--|--|--|---------------------------------------------------------------------------------------------------------------------------------------------------------------------------------------------------------------------------------------------------------------------------------------------------------------------------------------------------------------------------------------------------------------------------------------------------------------------------------------------------------------------------------------|--|--|

|    |                          |                  |                                            |                                                                                                                                                                                                                                                                                                                                                                                                                                                                                                                                                                                                                                                                                                                                                                                                                                                                                                                                                                          |       |          |
|----|--------------------------|------------------|--------------------------------------------|--------------------------------------------------------------------------------------------------------------------------------------------------------------------------------------------------------------------------------------------------------------------------------------------------------------------------------------------------------------------------------------------------------------------------------------------------------------------------------------------------------------------------------------------------------------------------------------------------------------------------------------------------------------------------------------------------------------------------------------------------------------------------------------------------------------------------------------------------------------------------------------------------------------------------------------------------------------------------|-------|----------|
| 11 | #4 AND #5 AND #7 AND #10 | Publication Date | Child: 6-12 years, Adolescent: 13-18 years | ("Demographic"[Title/Abstract] OR "family"[Title/Abstract] OR "education level"[Title/Abstract] OR "SES"[Title/Abstract] OR "socioeconomic status"[Title/Abstract] OR "social position"[Title/Abstract] OR "socioeconomic position"[Title/Abstract] OR "SEP"[Title/Abstract] OR "employment"[Title/Abstract] OR "income"[Title/Abstract] OR "occupational status"[Title/Abstract] OR "occupational class"[Title/Abstract] OR "depriv*" [Title/Abstract] OR "affluence"[Title/Abstract] OR "maternal education"[Title/Abstract] OR "parent education"[Title/Abstract] OR "car ownership"[Title/Abstract]) AND ("adolescent"[MeSH Terms] OR "child"[MeSH Terms:noexp]) AND ("child"[MeSH Terms:noexp] OR "adolescent"[MeSH Terms]) AND (("physical*" [Title/Abstract] OR "activ*" [Title/Abstract] OR "physical activity"[Title/Abstract] OR "sport"[Title/Abstract] OR "cycling"[Title/Abstract] OR "bicycling"[Title/Abstract] OR "walking"[Title/Abstract] OR "physical | 2,481 | 10:44:09 |
|----|--------------------------|------------------|--------------------------------------------|--------------------------------------------------------------------------------------------------------------------------------------------------------------------------------------------------------------------------------------------------------------------------------------------------------------------------------------------------------------------------------------------------------------------------------------------------------------------------------------------------------------------------------------------------------------------------------------------------------------------------------------------------------------------------------------------------------------------------------------------------------------------------------------------------------------------------------------------------------------------------------------------------------------------------------------------------------------------------|-------|----------|

|  |  |  |  |                                                                                                                                                                                                                                                                                                                                                                                                                                                                                                                                                                                                                                                                                                                                                                                                                                                                                                                                                                                                                                                                                                           |  |  |
|--|--|--|--|-----------------------------------------------------------------------------------------------------------------------------------------------------------------------------------------------------------------------------------------------------------------------------------------------------------------------------------------------------------------------------------------------------------------------------------------------------------------------------------------------------------------------------------------------------------------------------------------------------------------------------------------------------------------------------------------------------------------------------------------------------------------------------------------------------------------------------------------------------------------------------------------------------------------------------------------------------------------------------------------------------------------------------------------------------------------------------------------------------------|--|--|
|  |  |  |  | education"[Title/Abstract]<br>OR<br>"exercise"[Title/Abstract]<br>OR "energy<br>expenditure"[Title/Abstract] OR "physical<br>inactivity"[Title/Abstract]<br>OR "physical<br>fitness"[Title/Abstract]<br>OR "active<br>travel"[Title/Abstract] OR<br>"commuting"[Title/Abstract] OR "motor<br>activity"[Title/Abstract]<br>OR "play"[Title/Abstract])<br>AND ("child"[MeSH<br>Terms:noexp] OR<br>"adolescent"[MeSH<br>Terms])) AND<br>(("sedentar*" [Title/Abstract] OR "sedentary<br>behavio*" [Title/Abstract]<br>OR<br>"Computer"[Title/Abstract] OR "tv<br>viewing"[Title/Abstract]<br>OR<br>"sitting"[Title/Abstract]<br>OR<br>"Television"[Title/Abstract] OR "Screen-<br>Time"[Title/Abstract] OR<br>"Screen-<br>Based"[Title/Abstract] OR<br>"Screen-<br>Based"[Title/Abstract] OR<br>"inactiv*" [Title/Abstract]<br>OR "sedentary<br>time"[Title/Abstract] OR<br>"sitting<br>time"[Title/Abstract] OR<br>"Screen-<br>Time"[Title/Abstract])<br>AND ("child"[MeSH<br>Terms:noexp] OR<br>"adolescent"[MeSH<br>Terms])) AND<br>("child"[MeSH<br>Terms:noexp] OR<br>"adolescent"[MeSH<br>Terms])) AND |  |  |
|--|--|--|--|-----------------------------------------------------------------------------------------------------------------------------------------------------------------------------------------------------------------------------------------------------------------------------------------------------------------------------------------------------------------------------------------------------------------------------------------------------------------------------------------------------------------------------------------------------------------------------------------------------------------------------------------------------------------------------------------------------------------------------------------------------------------------------------------------------------------------------------------------------------------------------------------------------------------------------------------------------------------------------------------------------------------------------------------------------------------------------------------------------------|--|--|



|  |  |  |  |                                                                                                                                                                                                                                                                                                                                                                                                                                                                                                                                     |  |  |
|--|--|--|--|-------------------------------------------------------------------------------------------------------------------------------------------------------------------------------------------------------------------------------------------------------------------------------------------------------------------------------------------------------------------------------------------------------------------------------------------------------------------------------------------------------------------------------------|--|--|
|  |  |  |  | ("child"[Title/Abstract]<br>OR<br>"children"[Title/Abstract]<br>OR<br>"childhood"[Title/Abstract]<br>OR<br>"kids"[Title/Abstract] OR<br>"adolescen*"[Title/Abstract]<br>OR "young<br>person"[Title/Abstract]<br>OR "young<br>people"[Title/Abstract]<br>OR<br>"teen*"[Title/Abstract]<br>OR<br>"youth*"[Title/Abstract]<br>OR "boy"[Title/Abstract]<br>OR "girl*"[Title/Abstract])<br>AND ("child"[MeSH<br>Terms:noexp] OR<br>"adolescent"[MeSH<br>Terms]) AND<br>("child"[MeSH<br>Terms:noexp] OR<br>"adolescent"[MeSH<br>Terms])) |  |  |
|--|--|--|--|-------------------------------------------------------------------------------------------------------------------------------------------------------------------------------------------------------------------------------------------------------------------------------------------------------------------------------------------------------------------------------------------------------------------------------------------------------------------------------------------------------------------------------------|--|--|

|    |                                                                                                                                                                                                                                                                                        |                  |                                            |                                                                                                                                                                                                                                                                                                                                                                                             |           |          |
|----|----------------------------------------------------------------------------------------------------------------------------------------------------------------------------------------------------------------------------------------------------------------------------------------|------------------|--------------------------------------------|---------------------------------------------------------------------------------------------------------------------------------------------------------------------------------------------------------------------------------------------------------------------------------------------------------------------------------------------------------------------------------------------|-----------|----------|
| 10 | child[tiab] OR<br>children[tiab]<br>OR<br>childhood[tiab]<br>OR kids[tiab]<br>OR<br>adolescen*[tiab]<br>] OR young<br>person[tiab] OR<br>young<br>people[tiab] OR<br>teen*[tiab] OR<br>youth*[tiab] OR<br>boy*[tiab] OR<br>girl*[tiab] AND<br>(child[Filter] OR<br>adolescent[Filter]) | Publication Date | Child: 6-12 years, Adolescent: 13-18 years | ("child"[Title/Abstract] OR "children"[Title/Abstract] OR "childhood"[Title/Abstract] OR "kids"[Title/Abstract] OR "adolescen*"[Title/Abstract] OR "young person"[Title/Abstract] OR "young people"[Title/Abstract] OR "teen*"[Title/Abstract] OR "youth*"[Title/Abstract] OR "boy"[Title/Abstract] OR "girl*"[Title/Abstract]) AND ("child"[MeSH Terms:noexp] OR "adolescent"[MeSH Terms]) | 1,105,509 | 10:43:27 |
|----|----------------------------------------------------------------------------------------------------------------------------------------------------------------------------------------------------------------------------------------------------------------------------------------|------------------|--------------------------------------------|---------------------------------------------------------------------------------------------------------------------------------------------------------------------------------------------------------------------------------------------------------------------------------------------------------------------------------------------------------------------------------------------|-----------|----------|

|   |                                                                                                                                                                                                                                        |                      |                                                          |                                                                                                                                                                                                                                                                                                                                                                                                                                                                                                                                                                                                            |               |              |
|---|----------------------------------------------------------------------------------------------------------------------------------------------------------------------------------------------------------------------------------------|----------------------|----------------------------------------------------------|------------------------------------------------------------------------------------------------------------------------------------------------------------------------------------------------------------------------------------------------------------------------------------------------------------------------------------------------------------------------------------------------------------------------------------------------------------------------------------------------------------------------------------------------------------------------------------------------------------|---------------|--------------|
| 9 | child[tiab] OR<br>children[tiab]<br>OR<br>childhood[tiab]<br>OR kids[tiab]<br>OR<br>adolescen*[tiab]<br>] OR young<br>person[tiab] OR<br>young<br>people[tiab] OR<br>teen*[tiab] OR<br>youth*[tiab] OR<br>boy*[tiab] OR<br>girl*[tiab] | Publicati<br>on Date | Child: 6-<br>12 years,<br>Adolesce<br>nt: 13-18<br>years | "child"[Title/Abstract] OR<br>"children"[Title/Abstract]<br>OR<br>"childhood"[Title/Abstrac<br>t] OR<br>"kids"[Title/Abstract] OR<br>"adolescen*"[Title/Abstra<br>ct] OR "young<br>person"[Title/Abstract]<br>OR ("young"[All Fields]<br>OR "youngs"[All Fields])<br>AND ("people s"[All<br>Fields] OR "peopled"[All<br>Fields] OR "peopling"[All<br>Fields] OR<br>"persons"[MeSH Terms]<br>OR "persons"[All Fields]<br>OR "people"[All Fields]<br>OR "peoples"[All Fields]))<br>OR<br>"teen*"[Title/Abstract]<br>OR<br>"youth*"[Title/Abstract]<br>OR "boy"[Title/Abstract]<br>OR "girl*"[Title/Abstract] | 1,536,7<br>26 | 10:42:<br>06 |
|---|----------------------------------------------------------------------------------------------------------------------------------------------------------------------------------------------------------------------------------------|----------------------|----------------------------------------------------------|------------------------------------------------------------------------------------------------------------------------------------------------------------------------------------------------------------------------------------------------------------------------------------------------------------------------------------------------------------------------------------------------------------------------------------------------------------------------------------------------------------------------------------------------------------------------------------------------------------|---------------|--------------|

|   |                                                                                                              |                  |                                            |                                                                                                                                                                                      |        |          |
|---|--------------------------------------------------------------------------------------------------------------|------------------|--------------------------------------------|--------------------------------------------------------------------------------------------------------------------------------------------------------------------------------------|--------|----------|
| 8 | United kingdom[tiab] OR UK[tiab] OR Wales[tiab] OR England[tiab] OR Scotland[tiab] OR Northern Ireland[tiab] | Publication Date | Child: 6-12 years, Adolescent: 13-18 years | "united kingdom"[Title/Abstract] OR "UK"[Title/Abstract] OR "Wales"[Title/Abstract] OR "England"[Title/Abstract] OR "Scotland"[Title/Abstract] OR "northern ireland"[Title/Abstract] | 35,254 | 10:40:35 |
|---|--------------------------------------------------------------------------------------------------------------|------------------|--------------------------------------------|--------------------------------------------------------------------------------------------------------------------------------------------------------------------------------------|--------|----------|

|   |                                                                                                                                                                                                                                                                                                                                                                                                      |                      |                                                          |                                                                                                                                                                                                                                                                                                                                                                                                                                                                                                                                                                                             |        |              |
|---|------------------------------------------------------------------------------------------------------------------------------------------------------------------------------------------------------------------------------------------------------------------------------------------------------------------------------------------------------------------------------------------------------|----------------------|----------------------------------------------------------|---------------------------------------------------------------------------------------------------------------------------------------------------------------------------------------------------------------------------------------------------------------------------------------------------------------------------------------------------------------------------------------------------------------------------------------------------------------------------------------------------------------------------------------------------------------------------------------------|--------|--------------|
| 7 | Sedentar*[tiab]<br>OR Sedentary<br>behavio*[tiab]<br>OR<br>Computer[tiab]<br>OR 'TV<br>viewing'[tiab]<br>OR sitting[tiab]<br>OR<br>Television[tiab]<br>OR Screen-<br>Time[tiab] OR<br>Screen-<br>Based[tiab] OR<br>screen<br>based[tiab] OR<br>inactiv*[tiab]<br>OR sedentary<br>time[tiab] OR<br>'sitting<br>time'[tiab] OR<br>screen<br>time[tiab] AND<br>(child[Filter] OR<br>adolescent[Filter]) | Publicati<br>on Date | Child: 6-<br>12 years,<br>Adolesce<br>nt: 13-18<br>years | ("sedentar*[Title/Abstra<br>ct] OR "sedentary<br>behavio*[Title/Abstract]<br>OR<br>"Computer"[Title/Abstrac<br>t] OR "tv<br>viewing"[Title/Abstract]<br>OR<br>"sitting"[Title/Abstract]<br>OR<br>"Television"[Title/Abstrac<br>t] OR "Screen-<br>Time"[Title/Abstract] OR<br>"Screen-<br>Based"[Title/Abstract] OR<br>"Screen-<br>Based"[Title/Abstract] OR<br>"inactiv*[Title/Abstract]<br>OR "sedentary<br>time"[Title/Abstract] OR<br>"sitting<br>time"[Title/Abstract] OR<br>"Screen-<br>Time"[Title/Abstract])<br>AND ("child"[MeSH<br>Terms:noexp] OR<br>"adolescent"[MeSH<br>Terms]) | 45,677 | 10:39:<br>13 |
|---|------------------------------------------------------------------------------------------------------------------------------------------------------------------------------------------------------------------------------------------------------------------------------------------------------------------------------------------------------------------------------------------------------|----------------------|----------------------------------------------------------|---------------------------------------------------------------------------------------------------------------------------------------------------------------------------------------------------------------------------------------------------------------------------------------------------------------------------------------------------------------------------------------------------------------------------------------------------------------------------------------------------------------------------------------------------------------------------------------------|--------|--------------|

|   |                                                                                                                                                                                                                                                                                                                                                                                                       |                  |                                            |                                                                                                                                                                                                                                                                                                                                                                                                                                                                                                                                                                                                                 |         |          |
|---|-------------------------------------------------------------------------------------------------------------------------------------------------------------------------------------------------------------------------------------------------------------------------------------------------------------------------------------------------------------------------------------------------------|------------------|--------------------------------------------|-----------------------------------------------------------------------------------------------------------------------------------------------------------------------------------------------------------------------------------------------------------------------------------------------------------------------------------------------------------------------------------------------------------------------------------------------------------------------------------------------------------------------------------------------------------------------------------------------------------------|---------|----------|
| 5 | physical*[tiab]<br>OR activ*[tiab]<br>OR 'physical activity'[tiab]<br>OR sport[tiab]<br>OR cycling[tiab]<br>OR<br>bicycling[tiab]<br>OR<br>walking[tiab]<br>OR physical education[tiab]<br>OR<br>exercise[tiab]<br>OR 'energy expenditure'[tiab] OR 'physical inactivity'[tiab]<br>OR 'physical fitness'[tiab] OR 'active travel'[tiab] OR commuting[tiab] OR 'motor activity'[tiab]<br>OR play[tiab] | Publication Date | Child: 6-12 years, Adolescent: 13-18 years | "physical*" [Title/Abstract] OR<br>"activ*" [Title/Abstract]<br>OR "physical activity" [Title/Abstract]<br>OR "sport" [Title/Abstract]<br>OR<br>"cycling" [Title/Abstract]<br>OR<br>"bicycling" [Title/Abstract]<br>OR<br>"walking" [Title/Abstract]<br>OR "physical education" [Title/Abstract]<br>OR<br>"exercise" [Title/Abstract]<br>OR "energy expenditure" [Title/Abstract] OR "physical inactivity" [Title/Abstract]<br>OR "physical fitness" [Title/Abstract]<br>OR "active travel" [Title/Abstract] OR "commuting" [Title/Abstract] OR "motor activity" [Title/Abstract]<br>OR "play" [Title/Abstract] | 399,685 | 10:34:55 |
|---|-------------------------------------------------------------------------------------------------------------------------------------------------------------------------------------------------------------------------------------------------------------------------------------------------------------------------------------------------------------------------------------------------------|------------------|--------------------------------------------|-----------------------------------------------------------------------------------------------------------------------------------------------------------------------------------------------------------------------------------------------------------------------------------------------------------------------------------------------------------------------------------------------------------------------------------------------------------------------------------------------------------------------------------------------------------------------------------------------------------------|---------|----------|

|   |                                                                                                                                                                                                                                                                                                                                                                                                                                                           |                  |                                            |                                                                                                                                                                                                                                                                                                                                                                                                                                                                                                                                                                                                                                                                         |         |          |
|---|-----------------------------------------------------------------------------------------------------------------------------------------------------------------------------------------------------------------------------------------------------------------------------------------------------------------------------------------------------------------------------------------------------------------------------------------------------------|------------------|--------------------------------------------|-------------------------------------------------------------------------------------------------------------------------------------------------------------------------------------------------------------------------------------------------------------------------------------------------------------------------------------------------------------------------------------------------------------------------------------------------------------------------------------------------------------------------------------------------------------------------------------------------------------------------------------------------------------------------|---------|----------|
| 4 | Demographic[tiab] OR family[tiab] OR 'education level'[tiab] OR SES[tiab] OR 'socioeconomic status'[tiab] OR 'social position'[tiab] OR 'socioeconomic position'[tiab] OR SEP[tiab] OR 'employment'[tiab] OR income[tiab] OR 'occupational status'[tiab] OR 'occupational class'[tiab] OR depriv*[tiab] OR affluence[tiab] OR 'maternal education'[tiab] OR 'parent education'[tiab] OR 'car ownership'[tiab] ] AND (adolescent[Filter] OR child[Filter]) | Publication Date | Child: 6-12 years, Adolescent: 13-18 years | ("Demographic"[Title/Abstract] OR "family"[Title/Abstract] OR "education level"[Title/Abstract] OR "SES"[Title/Abstract] OR "socioeconomic status"[Title/Abstract] OR "social position"[Title/Abstract] OR "socioeconomic position"[Title/Abstract] OR "SEP"[Title/Abstract] OR "employment"[Title/Abstract] OR "income"[Title/Abstract] OR "occupational status"[Title/Abstract] OR "occupational class"[Title/Abstract] OR "depriv*" [Title/Abstract] OR "affluence"[Title/Abstract] ] OR "maternal education"[Title/Abstract] OR "parent education"[Title/Abstract] OR "car ownership"[Title/Abstract] ] AND ("adolescent"[MeSH Terms] OR "child"[MeSH Terms:noexp]) | 237,586 | 10:31:26 |
|---|-----------------------------------------------------------------------------------------------------------------------------------------------------------------------------------------------------------------------------------------------------------------------------------------------------------------------------------------------------------------------------------------------------------------------------------------------------------|------------------|--------------------------------------------|-------------------------------------------------------------------------------------------------------------------------------------------------------------------------------------------------------------------------------------------------------------------------------------------------------------------------------------------------------------------------------------------------------------------------------------------------------------------------------------------------------------------------------------------------------------------------------------------------------------------------------------------------------------------------|---------|----------|

|   |                                                                                                                                                                                                                                                                                                                                                                        |                  |                                            |                                                                                                                                                                                                                                                                                                                                                                                                                                                                                                                                                                        |         |          |
|---|------------------------------------------------------------------------------------------------------------------------------------------------------------------------------------------------------------------------------------------------------------------------------------------------------------------------------------------------------------------------|------------------|--------------------------------------------|------------------------------------------------------------------------------------------------------------------------------------------------------------------------------------------------------------------------------------------------------------------------------------------------------------------------------------------------------------------------------------------------------------------------------------------------------------------------------------------------------------------------------------------------------------------------|---------|----------|
| 3 | Demographic[tiab] OR family[tiab] OR education level[tiab] OR SES[tiab] OR socioeconomic status[tiab] OR social position[tiab] OR socioeconomic position[tiab] OR SEP[tiab] OR employment[tiab] OR income[tiab] OR occupational status[tiab] OR occupational class[tiab] OR deprivation[tiab] OR affluence[tiab] OR maternal education[tiab] OR parent education[tiab] | Publication Date | Adolescent: 13-18 years, Child: 6-12 years | "Demographic"[Title/Abstract] OR "family"[Title/Abstract] OR "education level"[Title/Abstract] OR "SES"[Title/Abstract] OR "socioeconomic status"[Title/Abstract] OR "social position"[Title/Abstract] OR "socioeconomic position"[Title/Abstract] OR "SEP"[Title/Abstract] OR "employment"[Title/Abstract] OR "income"[Title/Abstract] OR "occupational status"[Title/Abstract] OR "occupational class"[Title/Abstract] OR "deprivation"[Title/Abstract] OR "affluence"[Title/Abstract] OR "maternal education"[Title/Abstract] OR "parent education"[Title/Abstract] | 236,113 | 10:29:06 |
|---|------------------------------------------------------------------------------------------------------------------------------------------------------------------------------------------------------------------------------------------------------------------------------------------------------------------------------------------------------------------------|------------------|--------------------------------------------|------------------------------------------------------------------------------------------------------------------------------------------------------------------------------------------------------------------------------------------------------------------------------------------------------------------------------------------------------------------------------------------------------------------------------------------------------------------------------------------------------------------------------------------------------------------------|---------|----------|



|   |                                                                                                                                                                                                                                                                                                                                                                        |                  |                   |                                                                                                                                                                                                                                                                                                                                                                                                                                                                                                                                                                        |         |          |
|---|------------------------------------------------------------------------------------------------------------------------------------------------------------------------------------------------------------------------------------------------------------------------------------------------------------------------------------------------------------------------|------------------|-------------------|------------------------------------------------------------------------------------------------------------------------------------------------------------------------------------------------------------------------------------------------------------------------------------------------------------------------------------------------------------------------------------------------------------------------------------------------------------------------------------------------------------------------------------------------------------------------|---------|----------|
| 2 | Demographic[tiab] OR family[tiab] OR education level[tiab] OR SES[tiab] OR socioeconomic status[tiab] OR social position[tiab] OR socioeconomic position[tiab] OR SEP[tiab] OR employment[tiab] OR income[tiab] OR occupational status[tiab] OR occupational class[tiab] OR deprivation[tiab] OR affluence[tiab] OR maternal education[tiab] OR parent education[tiab] | Publication Date | Child: 6-12 years | "Demographic"[Title/Abstract] OR "family"[Title/Abstract] OR "education level"[Title/Abstract] OR "SES"[Title/Abstract] OR "socioeconomic status"[Title/Abstract] OR "social position"[Title/Abstract] OR "socioeconomic position"[Title/Abstract] OR "SEP"[Title/Abstract] OR "employment"[Title/Abstract] OR "income"[Title/Abstract] OR "occupational status"[Title/Abstract] OR "occupational class"[Title/Abstract] OR "deprivation"[Title/Abstract] OR "affluence"[Title/Abstract] OR "maternal education"[Title/Abstract] OR "parent education"[Title/Abstract] | 131,288 | 10:29:01 |
|---|------------------------------------------------------------------------------------------------------------------------------------------------------------------------------------------------------------------------------------------------------------------------------------------------------------------------------------------------------------------------|------------------|-------------------|------------------------------------------------------------------------------------------------------------------------------------------------------------------------------------------------------------------------------------------------------------------------------------------------------------------------------------------------------------------------------------------------------------------------------------------------------------------------------------------------------------------------------------------------------------------------|---------|----------|

|   |                                                                                                                                                                                                                                                                                                                                                                        |                  |  |                                                                                                                                                                                                                                                                                                                                                                                                                                                                                                                                                                        |           |          |
|---|------------------------------------------------------------------------------------------------------------------------------------------------------------------------------------------------------------------------------------------------------------------------------------------------------------------------------------------------------------------------|------------------|--|------------------------------------------------------------------------------------------------------------------------------------------------------------------------------------------------------------------------------------------------------------------------------------------------------------------------------------------------------------------------------------------------------------------------------------------------------------------------------------------------------------------------------------------------------------------------|-----------|----------|
| 1 | Demographic[tiab] OR family[tiab] OR education level[tiab] OR SES[tiab] OR socioeconomic status[tiab] OR social position[tiab] OR socioeconomic position[tiab] OR SEP[tiab] OR employment[tiab] OR income[tiab] OR occupational status[tiab] OR occupational class[tiab] OR deprivation[tiab] OR affluence[tiab] OR maternal education[tiab] OR parent education[tiab] | Publication Date |  | "Demographic"[Title/Abstract] OR "family"[Title/Abstract] OR "education level"[Title/Abstract] OR "SES"[Title/Abstract] OR "socioeconomic status"[Title/Abstract] OR "social position"[Title/Abstract] OR "socioeconomic position"[Title/Abstract] OR "SEP"[Title/Abstract] OR "employment"[Title/Abstract] OR "income"[Title/Abstract] OR "occupational status"[Title/Abstract] OR "occupational class"[Title/Abstract] OR "deprivation"[Title/Abstract] OR "affluence"[Title/Abstract] OR "maternal education"[Title/Abstract] OR "parent education"[Title/Abstract] | 1,325,619 | 10:28:50 |
|---|------------------------------------------------------------------------------------------------------------------------------------------------------------------------------------------------------------------------------------------------------------------------------------------------------------------------------------------------------------------------|------------------|--|------------------------------------------------------------------------------------------------------------------------------------------------------------------------------------------------------------------------------------------------------------------------------------------------------------------------------------------------------------------------------------------------------------------------------------------------------------------------------------------------------------------------------------------------------------------------|-----------|----------|
